# Supplementary material for: Solid-state NMR at natural isotopic abundance for the determination of conformational polymorphism – the case of designed β-turn peptides containing di-prolines
Source: Royal Society of Chemistry journal article supplement (doi:10.1039/c6cc08676d), 2017-01-01
Supplement: c6cc08676d1.pdf [file c6cc08676d1.pdf]

## Supporting Information

### Solid-state NMR at Natural Isotopic Abundance for the Determination of Conformational Polymorphism– The Case of designed $\beta$ -turn peptides containing di-prolines

Jayasubba Reddy Yarava,<sup>a,c,d</sup>, Rajesh Sonti,<sup>b,c,e</sup>, K. Kantharaju<sup>b,f</sup>, S. Raghothama<sup>c,\*</sup> and K.V. Ramanathan<sup>c,\*</sup>

<sup>a</sup>Department of Physics, <sup>b</sup>Molecular Biophysics Unit, <sup>c</sup>NMR Research Center  
Indian Institute of Science, Bangalore-560012, India.

#### Materials and Methods

The peptides Piv-<sup>L</sup>Pro- $\psi^{\text{H,CH}_3}$ Pro-Leu-NHMe (Peptide – 1) and Piv-<sup>D</sup>Pro- $\psi^{\text{CH}_3,\text{CH}_3}$ Pro-Leu-NHMe (Peptide – 2) were synthesized using the protocol known already.<sup>1</sup> NMR spectra of the samples were recorded on a Bruker Avance-III 500WB NMR spectrometer operating at a proton resonance frequency of 500.17 MHz. All experiments were performed at room temperature using a Bruker 4 mm triple resonance MAS probe, operating in double resonance mode. Sample spinning speeds employed were typically 11 kHz. Carbon-13 magnetization was generated by cross polarization with a rf amplitude ramp on the <sup>1</sup>H channel with a contact time of 2.0 ms. SPINAL-64<sup>2</sup> heteronuclear dipolar decoupling was employed throughout with an acquisition time of 40.0 ms. A proton rf field amplitude of 62.5 kHz was used 64 and 32 transients were co-added with a recycle delay of 5s employed for peptide-1 and 2 respectively. The assignment of all the proton, carbon and nitrogen resonances were carried out with the help of a set of 1D and 2D correlation experiments. The chemical shifts of nuclei relevant for the present study are given in Tables S1 to S3.

-----  
\* Authors for Correspondence

Current address:

d) Institut des Sciences et Ingènierie Chimiques, Ecole Polytechnique Fèdèrale de Lausanne, Switzerland.

e) Biozentrum, Structural Biology, Universität Basel, Basel, Switzerland.

f) Department of Chemistry, Rani Channamma University, Belgavi, India.

## 2D $^1\text{H}$ (DQ) – $^{13}\text{C}$ (SQ) Correlation Experiment

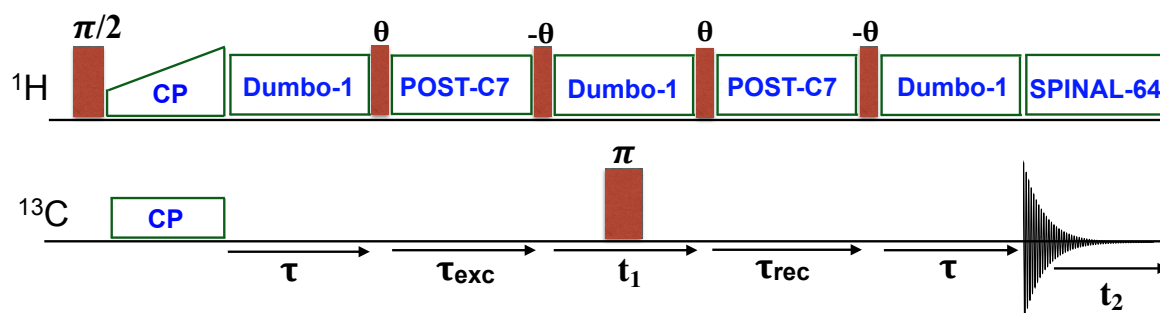

**Figure S1:** The pulse sequence for the two-dimensional MAS-J- $^1\text{H}$ (DQ)- $^{13}\text{C}$ -HMQC correlation experiment.

The two-dimensional MAS-J- $^1\text{H}$  (DQ)- $^{13}\text{C}$ -HMQC pulse sequence<sup>3</sup> used for peptide-2 is shown in **Figure S1**. The phase modulated decoupling scheme DUMBO-1<sup>4</sup> homonuclear decoupling with rf field amplitude of 100 kHz was applied in the  $\tau$  and  $t_1$  periods. The  $t_1$  increment was set to 32  $\mu\text{s}$  corresponding to one basic DUMBO-1 cycle. The  $\tau$  period was set to 2.0 ms. The POST-C7<sup>5</sup> recoupling was used for exciting DQ coherences and also for reconversion periods with the MAS of 11 kHz. 77 kHz rf power was used for the POST-C7 sequence. Two basic POST-C7 blocks were used with duration of 52  $\mu\text{s}$  long for the DQ excitation and reconversion. 448 scans were used for each of 188 TD points with recycle delay of 4.2 s between scans. Resulting total experimental time was 98.2 h. Spectra were acquired in the State-TPPI method.<sup>6</sup>

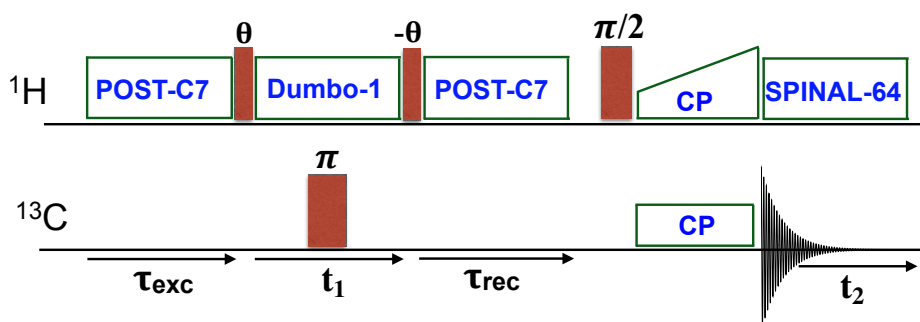

**Figure S2:** Pulse sequence for the two-dimensional  $^1\text{H}$ (DQ)- $^{13}\text{C}$ -HETCOR experiment.

For peptide-1, the 2D  $^1\text{H}$  DQ- $^{13}\text{C}$  HETCOR experiment<sup>7</sup> was employed which gave better S/N. The DUMBO-1 homonuclear dipolar decoupling was used for the  $t_1$  period. The CP contact time was set to 100  $\mu\text{s}$ . For each of 256  $t_1$  increments 64 transients were co-added with a recycle delay of 4s, resulting total experimental time of 18.2h. All the other parameters were same as for peptide-2.

**Assignments:**

**Peptide-1, Piv-<sup>L</sup>Pro- $\psi^{\text{H,CH}_3}$ Pro-Leu-NHMe**

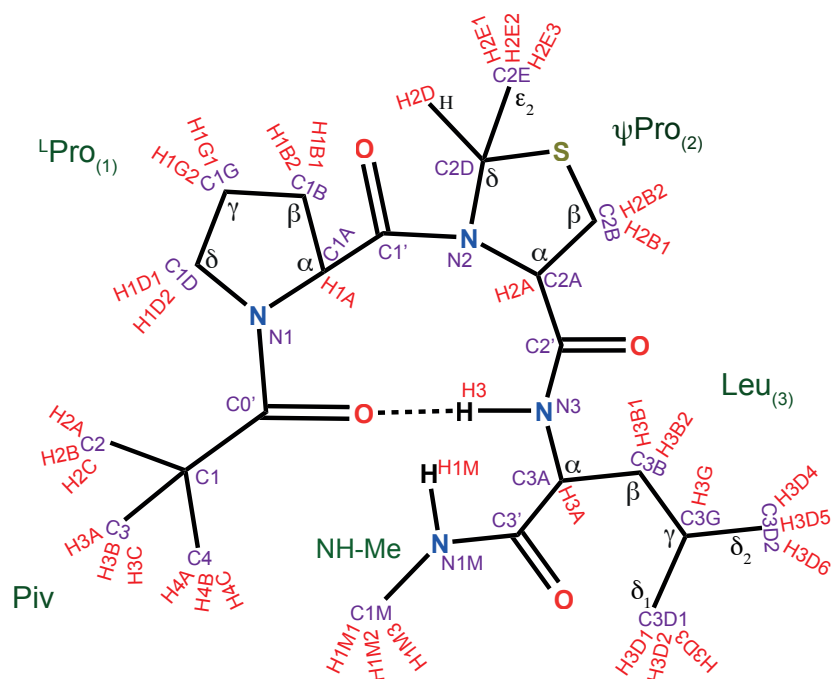

**Table-S1:** <sup>1</sup>H and <sup>13</sup>C chemical shifts of nuclei across the peptide bond in the diproline segment of Peptide -1

| Peptide-I Residues         | Atom label   | Chemical shift (ppm) |
|----------------------------|--------------|----------------------|
| Pro <sub>(1)</sub> α       | C1A          | 59.7                 |
| ψPro <sub>(2)</sub> α      | C2A          | 62.2                 |
| ψPro <sub>(2)</sub> δ(CH)  | C2D          | 60.4                 |
| ψPro <sub>(2)</sub> ε met. | C2E          | 27.8                 |
| Pro <sub>(1)</sub> α       | H1A          | 4.6                  |
| ψPro <sub>(2)</sub> α      | H2A          | 5.5                  |
| ψPro <sub>(2)</sub> δ (CH) | H2D          | 5.3                  |
| ψPro <sub>(2)</sub> ε met. | H2E1, E2, E3 | 0.7                  |

Peptide-2, Piv-<sup>D</sup>Pro-ψ<sup>CH<sub>3</sub>,CH<sub>3</sub></sup>Pro-Leu-NHMe

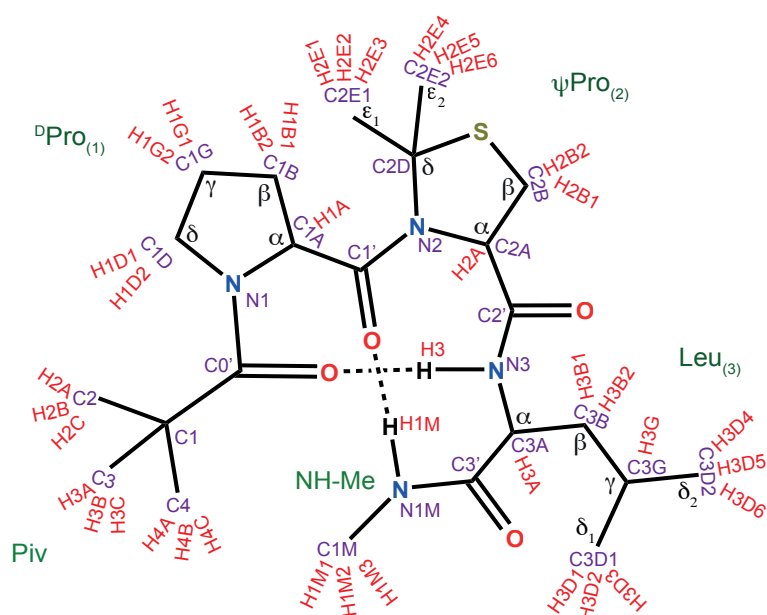

**Table-S2:** <sup>1</sup>H and <sup>13</sup>C chemical shifts of nuclei across the peptide bond in the diproline segment of Peptide -2

| Peptide-II Residues                                     | Atom label                            | Chemical shift<br><b>Mol. A , Mol. B</b><br>(ppm) |
|---------------------------------------------------------|---------------------------------------|---------------------------------------------------|
| <sup>D</sup> Pro <sub>(1)</sub> α                       | C1A                                   | 61.85, 61.85                                      |
| ψPro <sub>(2)</sub> α                                   | C2A                                   | 66.6, 66.6                                        |
| ψPro <sub>(2)</sub> ε <sub>1</sub> , ε <sub>2</sub> Met | C2E1, C2E2                            | 28.1, 28.1                                        |
| <sup>D</sup> Pro <sub>(1)</sub> α                       | H1A                                   | 3.6, 3.6                                          |
| ψPro <sub>(2)</sub> α                                   | H2A                                   | 5.4, 6.1                                          |
| ψPro <sub>(2)</sub> ε <sub>1</sub> , ε <sub>2</sub> Met | H2E1, H2E2, H2E3,<br>H2E4, H2E5, H2E6 | 0.7, 0.7                                          |

**Table-S3:** H<sub>N</sub> proton chemical shifts of peptide-2

| Peptide-II Residues | Atom label | Chemical shift<br><b>Mol. A , Mol. B</b><br>(ppm) |
|---------------------|------------|---------------------------------------------------|
| Leu NH              | H3         | 7.9, 8.3                                          |
| (NH)Me              | H1M        | 6.7, 7.9                                          |

## References

- 1 Kantharaju, S. Raghothama, U. S. Raghavender, S. Aravinda, N. Shamala and P. Balaram, *Peptide Science*, 2009, **92**, 405.
- 2 B. M. Fung, A. K. Khitrin and K. Ermolaev, *J. Magn. Reson.*, 2000, **142**, 97.
- 3 Y. Jayasubba Reddy, V. Agarwal, A. Lesage, L. Emsley and K. V. Ramanathan, *J. Magn. Reson.*, 2014, **245**, 31.
- 4 A. Lesage, D. Sakellariou, S. Hediger, B. Eléna, P. Charmont, S. Steuernagel and L. Emsley, *J. Magn. Reson.*, 2003, **163**, 105.
- 5 M. Hohwy, H. J. Jakobsen, M. Eden, M. H. Levitt and N. C. Nielsen, *J. Chem. Phys.*, 1998, **108**, 2686.
- 6 D. Marion, M. Ikura, R. Tschudin and A. Bax, *J. Magn. Reson. (1969)*, 1989, **85**, 393.
- 7 A. Lesage, L. Emsley, F. Penin and A. Böckmann, *J. Am. Chem. Soc.*, 2006, **128**, 8246.
